# Supplementary material for: Adipose‐Derived Fatty Acid‐Binding Proteins Plasma Concentrations Are Increased in Breast Cancer Patients
Source: PubMed Central journal article supplement — Oncologist. 2017 Jul 12;22(11):1309–15. doi: 10.1634/theoncologist.2016-0483 (PMC5679823; doi:10.1634/theoncologist.2016-0483), 2017-07-12
Supplement: supp_the2016-0483_onco12208-sup-0001-suppinfo1.pdf [file supp_the2016-0483_onco12208-sup-0001-suppinfo1.pdf]

Supplemental Table for:  
Adipose-derived Fatty Acid-Binding Proteins Plasma Concentrations Are Increased in Breast Cancer Patients  
Sandra Guaita-Esteruelas et al.

**Table S1:** Linear regression analysis of FABP4 and FABP5 with breast cancer (model 6, table 4)

|          | FABP4  |         | FABP5  |         |
|----------|--------|---------|--------|---------|
|          | beta   | p value | beta   | p value |
| BC       | 4.86   | <0,0001 | 0.88   | <0,05   |
| Age      | 0.079  | 0.080   | 0.023  | 0.235   |
| BMI      | 0.62   | <0,0001 | 0.09   | 0.048   |
| hsCRP    | 0.54   | <0,05   | 0.045  | 0.508   |
| Non-HDLc | -0.165 | 0.78    | -0.119 | 0.644   |
| TG       | 1.039  | 0.055   | 0.523  | <0,05   |

Beta unstandardized coefficients. BC, Breast cancer; BMI, body mass index; hsCRP, high-sensitivity C-reactive protein, Non-HDLc, non-HDL cholesterol; TG, triglycerides
